1 **The diverse viromes of Australian lizards are shaped by host**  
2 **taxonomy and habitat**

3

4

5 Jackie E. Mahar<sup>1\*</sup>, Michelle Wille<sup>2</sup>, Erin Harvey<sup>1</sup>, Craig C. Moritz<sup>3</sup>, Edward C. Holmes<sup>1</sup>

6

7

8 <sup>1</sup>Sydney Institute for Infectious Diseases, School of Medical Sciences, The University of  
9 Sydney, Sydney, New South Wales 2006, Australia

10 <sup>2</sup>Centre for Pathogen Genomics, Department of Microbiology and Immunology, at the Peter  
11 Doherty Institute for Infection and Immunity. The University of Melbourne, Melbourne,  
12 Victoria 3000, Australia.

13 <sup>3</sup>Research School of Biology & Centre for Biodiversity Analysis, The Australian National  
14 University, Canberra, ACT 2600, Australia.

15

16 \*Current address: Australian Centre for Disease Control, Australian Animal Health  
17 Laboratory and Health and Biosecurity, Commonwealth Scientific and Industrial Research  
18 Organisation, Geelong, VIC 3219, Australia

19

20 #Correspondence to:

21 Edward C. Holmes

22 [edward.holmes@sydney.edu.au](mailto:edward.holmes@sydney.edu.au)

23 Tel. +61 2 9351 5591

24

25 Text word count: 6443

26 Abstract

27 Lizards inhabit diverse ecologies and evolutionary histories and hence represent a promising  
28 group to explore how hosts shape virome structure and virus evolution. Yet little is known  
29 about the viromes of these animals. In Australia, squamates (lizards and snakes) comprise the  
30 most diverse order of vertebrates, and Australia hosts the highest diversity of lizards globally,  
31 with the greatest breadth of habitat use. We used meta-transcriptomic sequencing to  
32 determine the virome of nine co-distributed, tropical lizard species from three taxonomic  
33 families in Australia and analyzed these data to identify host traits associated with viral  
34 abundance and diversity. We show that lizards carry a large diversity of viruses, identifying  
35 more than 30 novel, highly divergent vertebrate-associated viruses. These viruses were from  
36 nine viral families, including several that contain well known pathogens, such as the  
37 *Flaviviridae*, *Picornaviridae*, *Bornaviridae*, *Iridoviridae* and *Rhabdoviridae*. Members of the  
38 *Flaviviridae* were particularly abundant across species sampled here, largely belonging to the  
39 genus *Hepacivirus*: 14 novel *Hepaciviruses* were identified, broadening the known diversity  
40 of this group and better defining its evolution by uncovering new reptilian clades. The  
41 evolutionary histories of the viruses studied here frequently aligned with the biogeographic  
42 and phylogenetic histories of the hosts, indicating that exogenous viruses may help infer host  
43 evolutionary history if sampling is strategic and sampling density high enough. Notably,  
44 analysis of alpha and beta diversity revealed that virome composition and richness was  
45 shaped by host taxonomy, habitat and range size. In sum, we identified a diverse range of  
46 reptile viruses that broadly contributes to our understanding of virus-host ecology and  
47 evolution.

48  
49 Keywords: evolution, metagenomics, meta-transcriptomics, viral ecology, one health,  
50 *Hepacivirus*

## 51 **1. Introduction**

52 Animal virology has traditionally focused on viruses of mammals and birds as they are the  
53 most likely natural reservoir hosts for viruses that may emerge in humans and animals of  
54 economic importance (Mollentze and Streicker 2020; Zhang et al. 2018). While this has  
55 provided major insights, it has necessarily resulted in a skewed view of viral diversity that  
56 limits our understanding of virus evolution and ecology, including the frequency and  
57 determinants of cross-species transmission and host range. Indeed, many viral families  
58 traditionally associated with mammals and birds have now been found in other vertebrate  
59 classes such as amphibians, reptiles and fish (Harding et al. 2022; Shi et al. 2018). Since far  
60 greater biological diversity exists within these other vertebrates – that comprise ~33,000  
61 documented species – it is reasonable to assume that they also harbour a substantial diversity  
62 of viruses (Zhang et al. 2018).

63  
64 A variety of factors make lizards particularly informative for the study of viral ecology and  
65 evolution. Squamates (lizards and snakes) are a highly diverse and successful group of  
66 vertebrates, comprising 96.3% of non-avian reptile diversity (Pincheira-Donoso et al. 2013),  
67 with over 10,000 extant species globally (Herrera-Flores et al. 2021). Squamates exhibit a  
68 range of morphologies, life history traits, and diverse ecologies, inhabiting every continent  
69 except Antarctica (Pincheira-Donoso et al. 2013; Pyron, Burbrink and Wiens 2013). Australia  
70 is home to the largest number of reptile species, comprising ~10% of the world's reptiles  
71 (Geyle et al. 2021), of which squamates are the most diverse vertebrate order (Wilson and  
72 Swan 2017). These animals are well adapted to the Australian landscape, colonising and  
73 radiating across a diverse range of environments and ecological niches (Pianka 1969; Pianka  
74 1973; Morton and James 1988;). Australian lizards comprise old endemic Gondwanan  
75 lineages that pre-date the isolation of Australia and Antarctica, as well as more recent  
76 immigrant lineages from the North (Brennan and Oliver 2017). For example, the Gondwanan  
77 group of Pygopodoidea have a crown age of greater than 50 million years, while the genus  
78 *Gehyra* have a crown age in the mid-Miocene ~20 million years ago, having colonized from  
79 Asia (Oliver and Hugall 2017). Several squamate species are at high risk of extinction within  
80 the next twenty years (Geyle et al. 2021) and infectious disease emergence can severely  
81 threaten reptile populations (Zhang et al. 2018).

82

83 A key, yet rarely addressed, aspect of virus evolution and emergence is understanding the  
84 traits that determine the diversity and abundance of viruses carried by a host (Wille et al.  
85 2019). A number of studies have linked viral diversity and abundance to specific host traits,  
86 including phylogenetic history, habitat, body mass, geographic range, community diversity,  
87 biome, location, and infection status with particular pathogens (Olival et al. 2017; Wille et al.  
88 2018; Geoghegan et al. 2021). However, the effects of host ecology on viral diversity have  
89 only been explored in a handful of systems with varying results. To better understand the  
90 diversity of viruses carried in lizards and how host traits affect viral abundance and diversity  
91 we used meta-transcriptomic sequencing to explore the virome of nine lizard species residing  
92 in various environments and habitats across the biologically diverse monsoonal tropics of  
93 northern Australia.

94

## 95 **2. Methods**

### 96 **2.1 Ethics statement**

97 All work was carried out according to the Australian Code for the Care and Use of Animals  
98 for Scientific Purposes with approval from the institutional animal ethics committee (Permit  
99 ANU animal ethics approval A2016-07) and State authorities (collecting permits NT 58454  
100 and WA SF010911).

101

### 102 **2.2 Animal Sampling**

103 Liver samples were collected from apparently healthy *Carlia amax*, *Carlia munda*, *Carlia*  
104 *sexdentata*, *Cryptoblepharus metallicus*, *Heteronotia planiceps*, *Heteronotia binoei*, *Gehyra*  
105 *nana*, *Gehyra arnhemica*, and *Oedura marmorata*. Lizards were collected in autumn and  
106 winter months between April 2016 and June 2017, in arid regions of the eastern Kimberley  
107 and mesic regions of the “Top End”, Australia (Table 1, Table S1). Samples were collected in  
108 Australian bioregions Arnhem Coast (ARC), Victoria Bonaparte (VIB), Central Arnhem  
109 (CEA), Daly Basin (DAB), or Darwin Coastal (DAC) (Table S1), as defined by Interim  
110 Biogeographic Regionalisation for Australia (IBRA), version 7. Excised liver was stored in  
111 RNeasy Lysis Solution (Qiagen, Crawley, Australia), at room temperature  
112 while in the field and then at 4°C for longer term storage. Sampled animals displayed no  
113 obvious signs of serious pathology.

114

### 115 **2.3 RNA extraction**

116 Liver tissue was homogenized using the Qiagen Tissue Lyser II with 3mm stainless steel  
117 beads in Qiagen buffer RLT (Hilden, Germany); and RNA extracted using the Qiagen  
118 RNeasy Plus minikit (Hilden, Germany) according to the manufacturer's protocol. Purified  
119 RNA was pooled in equimolar ratios into eleven pools, grouping RNA samples from the  
120 same lizard species and collection location, with six to twelve individuals per pool (Table 1,  
121 Table S1). Pooled RNA was further purified using the RNeasy MinElute clean-up kit  
122 (Qiagen, Hilden, Germany) and quantified using the Qubit RNA Broad-range Assay with the  
123 Qubit Fluorometer v3.0 (ThermoFisher Scientific).

124

### 125 **2.4 Meta-transcriptomic sequencing**

126 RNA pools were assessed for quality using the Agilent 2100 Bioanalyzer with the Agilent  
127 RNA 6000 Nano Assay (Agilent Technologies, CA, USA). Library construction and  
128 sequencing was performed at the Australian Genomic Research Facility (Victoria, Australia).  
129 Libraries were constructed using the TruSeq Total RNA Library Preparation protocol  
130 (Illumina, CA, USA) following rRNA removal using the Illumina Ribo-zero Gold  
131 epidemiology kit. Paired-end (100 bp) sequencing of each RNA library was performed on a  
132 HiSeq 2500 sequencing platform (Illumina, CA, USA).

133

### 134 **2.5 Genome/transcript assembly, annotation and abundance calculation**

135 After trimming with Trimmomatic v0.38 (Bolger, Lohse and Usadel 2014), reads were  
136 assembled *de novo* using two separate assemblers – Trinity v2.5.1 (Grabherr et al. 2011) and  
137 Megahit v1.2.9 (Li et al. 2015) – to increase the chances of correctly assembling all viral  
138 contigs. Contigs from both methods were combined and duplicates removed (retaining the  
139 longest version) using CD-HIT-EST v4.8.1 (Fu et al. 2012). Viral contigs were identified  
140 using BLASTn (Altschul et al. 1990) and DIAMOND BLASTx (Buchfink, Reuter and Drost  
141 2021) tools through alignment with the NCBI nucleotide (nt) database (*e*-value cut-off  $1 \times 10^{-10}$ )  
142 and non-redundant protein (nr) database (*e*-value cut-off  $1 \times 10^{-5}$ ), respectively. The  
143 Geneious assembler (available in Geneious Prime ® 2022.2.2) was used to extend viral  
144 contigs where possible. Open reading frames were identified using the Find ORFs tool within  
145 Geneious Prime, and conserved domains were identified using RSP-TBLASTN v2.12.0+  
146 (Altschul et al. 1997) against the NCBI Conserved Domains database. The abundance of each  
147 viral contig was calculated as expected counts (from mapped trimmed reads) using the RSEM

148 tool in Trinity v2.5.2 (Li et al. 2010). Overall abundance was calculated as expected  
149 count/total number of trimmed reads in library x 100. Novel viruses that shared greater than  
150 90% amino acid identity in the RdRp were considered to represent the same species. Likely  
151 vertebrate-infecting viruses were defined as those that belong to classically vertebrate-  
152 infecting viral families and/or those that clustered with viruses known to infect vertebrate  
153 species in phylogenetic trees.

154

## 155 **2.6 Alpha and beta diversity analyses**

156 Diversity statistics were only obtained for viruses considered likely to infect vertebrate  
157 species (i.e., those likely to infect the sampled host) and viruses likely to be exogenous.  
158 *Retroviruses* were excluded due to the difficulty in determining whether they are endogenous  
159 or exogenous, and viral groups with disrupted ORFs were considered likely to be  
160 endogenous. We performed generalized linear models and selected the best-fit model at both  
161 the infraorder and family taxonomic level (among a set of possible models describing the  
162 relationship between taxonomy, habitat, environment, range size and the number of  
163 individuals in the library) based on the lowest AIC, as done previously (Geoghegan et al.  
164 2021; Chen et al. 2022). Host genus and species level were not considered due to small  
165 sample sizes. The Csex\_M library was excluded from all analyses because it contained no  
166 exogenous, biologically relevant viruses and as the only riparian library, may have skewed  
167 results. All other libraries were included for comparisons considering host taxonomy at the  
168 level of infraorder. Omar\_M was similarly removed for comparisons at the host family level  
169 as it was the only library representing Diplodactylidae. Alpha diversity, including richness,  
170 Shannon index, Simpson Index, Shannon effective and Simpson effective were calculated for  
171 each library (Lagkouvardos et al. 2017). Beta diversity was calculated using the Bray–Curtis  
172 dissimilarity matrix and virome structure was plotted as a function of nonmetric  
173 multidimensional scaling (NMDS) ordination and tested using Adonis tests (PERMANOVA)  
174 using the *vegan* and *phyloseq* packages (McMurdie and Holmes 2013; Oksanen et al. 2022).  
175 Analyses were performed in R version 4.2.3 in R Studio 2022.07.1.

176

## 177 **2.7 Phylogenetic analysis**

178 Viral amino acid sequences were aligned with representative sequences from the same viral  
179 family obtained from NCBI, using Clustal Omega v1.2.3 available in Geneious Prime. Where  
180 necessary, large data sets were condensed to a more manageable size using CD-HIT version

181 4.8.1 (Fu et al. 2012). TrimAl v1.4.1 (Capella-Gutiérrez, Silla-Martínez and Gabaldón 2009)  
182 was used to remove ambiguously aligned regions (using the gappyout setting in all cases  
183 except for the *Flaviviridae* alignment which required stricter manually applied settings to  
184 remove uninformative columns). Alignments were visualized in Geneious Prime. Maximum  
185 likelihood trees were inferred using IQTree v2.1.3 (Nguyen et al. 2015) with model selection  
186 estimated using ModelFinder within IQTree (Kalyaanamoorthy et al. 2017). Branch supports  
187 were estimated with the Shimodaira-Hasegawa (SH)-like approximate likelihood ratio test  
188 (Guindon et al. 2010). The size and length of each alignment is provided in Table S2 and  
189 details of assembled viral nucleotide consensus sequences that were translated for inclusion  
190 in phylogenies are provided in Table S3.

191  
192 To reduce the reporting of false positives due to index-hopping during sequencing for each  
193 viral contig present in more than one library, a viral contig was presumed to be a contaminant  
194 from another library if it met the following criteria: contig abundance was less than 0.1% of  
195 the abundance of that contig in the library where that contig was most abundant. This is based  
196 on the index-hopping rate of about 0.1-2% as listed by Illumina  
197 ([https://sapac.illumina.com/techniques/sequencing/ngs-library-prep/multiplexing/index-](https://sapac.illumina.com/techniques/sequencing/ngs-library-prep/multiplexing/index-hopping.html)  
198 [hopping.html](https://sapac.illumina.com/techniques/sequencing/ngs-library-prep/multiplexing/index-hopping.html)).

199

## 200 **2.8 Virus nomenclature**

201 Novel viral species were determined based on demarcation criteria assigned by the ICTV  
202 (International Committee on Taxonomy of Viruses) for the relevant families/genera  
203 (<https://ictv.global/report/genome>) and were randomly assigned provisional names. Note that  
204 because these virus names are provisional, we have only assigned common names rather than  
205 a full binomial nomenclature.

206

## 207 **3. Results**

### 208 **3.1 Viruses in Australian lizard species**

209 We sequenced 11 pooled RNA libraries with an average read count of 35,041,464 (Table 1).  
210 Each library was generated from liver samples of 6 to 12 apparently healthy lizards of a  
211 single species sampled from either the mesic Top End or from the relatively arid east  
212 Kimberley regions of Australia (Victoria-Bonaparte region; Table 1). Two widespread gecko  
213 species – *Heteronotia binoei* and *Gehyra nana* – were sampled from both regions. A high

214 diversity of vertebrate-associated viruses was detected, comprising nine different families and  
215 12 genera (Figure 1). While for most viral families only a single genus and species were  
216 documented, we identified viruses from at least two genera in each of the *Flaviviridae*,  
217 *Picornaviridae*, *Rhabdoviridae* and *Amnoonviridae*, and two species of the same genera in  
218 the *Astroviridae* (Figure 1B). Despite being present in only one library, the *Arenaviridae*  
219 were by far the most abundant viral family (Figure 1), with the *Flaviviridae* the second most  
220 abundant and detected in all three lizard families (5/11 libraries) (Figure 1A). Members of the  
221 *Picornaviridae* were also abundant and detected in five of 11 libraries, although were  
222 restricted to the Gekkota species (Gekkonidae and Diplodactylidae). No vertebrate-infecting  
223 viruses were shared between different lizard species (Figure 1B). At higher taxonomic scales,  
224 the genera *Hepacivirus* (*Flaviviridae*), *Shanbavirus* (*Picornaviridae*), and an unclassified  
225 genus of *Astroviridae*, were found in multiple lizard species (Figure 1). Five viral families  
226 were found across multiple host species: the *Flaviviridae*, *Picornaviridae*, *Astroviridae*,  
227 *Rhabdoviridae* and *Amnoonviridae*.



228 **Table 1. Details of lizard livers sampled and sequencing output for each library (see Table S1 for additional details).**

| <i>Library details</i> |                                   | <i>Taxonomy of sampled species</i> |               |                                   | <i>Sampling details and species characteristics</i> |                        |                               | <i>Output</i>              |
|------------------------|-----------------------------------|------------------------------------|---------------|-----------------------------------|-----------------------------------------------------|------------------------|-------------------------------|----------------------------|
| <i>Library Name</i>    | <i>No. of samples<sup>a</sup></i> | <i>Infra-order</i>                 | <i>Family</i> | <i>Genus and species</i>          | <i>Sampled region<sup>b</sup></i>                   | <i>Typical habitat</i> | <i>Range size<sup>c</sup></i> | <i>No. of paired reads</i> |
| <i>Cam_M</i>           | 8                                 | Scinciformata                      | Scincidae     | <i>Carlia amax</i>                | Top End (mesic)                                     | rocks                  | small                         | 27,151,104                 |
| <i>Cmun_M</i>          | 6                                 | Scinciformata                      | Scincidae     | <i>Carlia munda</i>               | Top End (mesic)                                     | general                | medium                        | 26,737,353                 |
| <i>CSEX_M</i>          | 8                                 | Scinciformata                      | Scincidae     | <i>Carlia sexdentata</i>          | Top End (mesic)                                     | riparian               | very small                    | 40,670,859                 |
| <i>Cmet_M</i>          | 9                                 | Scinciformata                      | Scincidae     | <i>Cryptoblepharus metallicus</i> | Top End (mesic)                                     | trees                  | very small                    | 29,719,339                 |
| <i>Hplan_A</i>         | 6                                 | Gekkota                            | Gekkonidae    | <i>Heteronotia planiceps</i>      | Kimberley (arid)                                    | rocks                  | very small                    | 36,902,535                 |
| <i>Hbin_A</i>          | 8                                 | Gekkota                            | Gekkonidae    | <i>Heteronotia binoei</i>         | Kimberley (arid)                                    | general                | very large                    | 40,480,482                 |
| <i>Hbin_M</i>          | 12                                | Gekkota                            | Gekkonidae    | <i>Heteronotia binoei</i>         | Top End (mesic)                                     | general                | very large                    | 52,580,948                 |
| <i>Gnan_A</i>          | 7                                 | Gekkota                            | Gekkonidae    | <i>Gehyra nana</i>                | Kimberley (arid)                                    | rocks                  | small                         | 26,343,593                 |
| <i>Gnan_M</i>          | 9                                 | Gekkota                            | Gekkonidae    | <i>Gehyra nana</i>                | Top End (mesic)                                     | rocks                  | small                         | 32,765,848                 |
| <i>Garn_M</i>          | 9                                 | Gekkota                            | Gekkonidae    | <i>Gehyra arnhemica</i>           | Top End (mesic)                                     | trees                  | small                         | 40,865,843                 |

|               |    |         |                 |                         |                    |       |       |            |
|---------------|----|---------|-----------------|-------------------------|--------------------|-------|-------|------------|
| <i>Omar_M</i> | 10 | Gekkota | Diplodactylidae | <i>Oedura marmorata</i> | Top End<br>(mesic) | rocks | small | 31,238,197 |
|---------------|----|---------|-----------------|-------------------------|--------------------|-------|-------|------------|

229

230 <sup>a</sup>No. of samples: Number of individuals pooled in library.

231 <sup>b</sup>Sampled region: Top End: Top End of Australia (Northern Territory), mesic environment; Kimberley: Kimberley region (Western Australia and  
232 Northern Territory), arid environment.

233 <sup>c</sup>Range size: Broadly summarised based on range listed on <https://arod.com.au>.

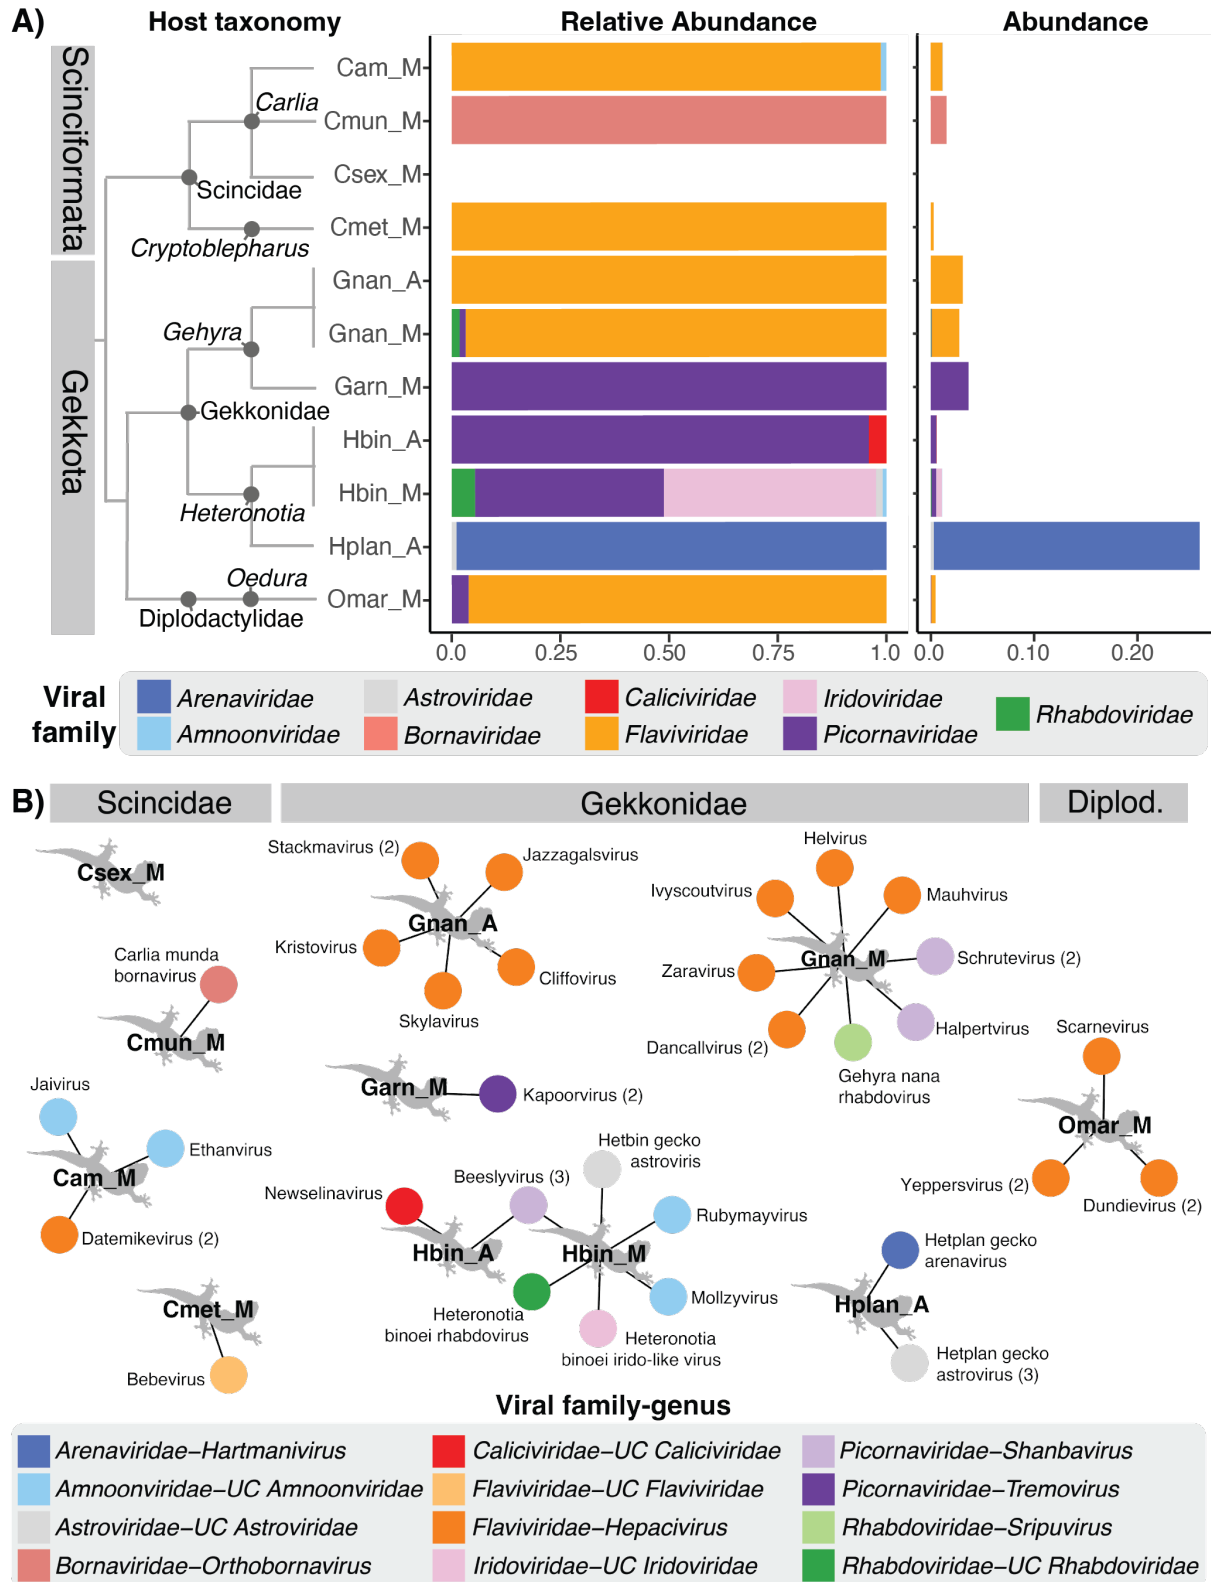

234  
235

236 **Figure 1. Biologically relevant viruses (i.e., viruses that infect vertebrates) in the**  
237 **sampled lizard species.** (A) Relative abundance (left plot) and overall abundance (right)  
238 of the vertebrate-infecting virus families present in each library. Libraries are plotted in  
239 taxonomic sequence, with host relationships indicated by a cladogram and host infraorder  
240 indicated in grey bars. Library names are as follows: Cam\_M, *Carlia amax* (collected from a  
241 mesic environment); Cmun\_M, *Carlia munda* (mesic), Csex\_M, *Carlia sexdentata* (mesic);

242 Cmet\_M, *Cryptoblepharus metallicus* (mesic); Gnan\_A, *Gehyra nana* (arid); Gnan\_M  
243 *Gehyra nana* (mesic); Garn\_M, *Gehyra arnhemica* (mesic); Hbin\_A, *Heteronotia binoei*  
244 (arid); Hbin\_M, *Heteronotia binoei* (mesic); Hplan\_A, *Heteronotia planiceps* (arid);  
245 Omar\_M, *Oedura marmorata* (mesic). (B) Viruses found in each library are represented by  
246 circles coloured by viral genus (UC=unclassified genus), with lines connecting them to the  
247 libraries in which they were found. Libraries are grouped by host family (indicated by grey  
248 bars above; Diplod.=Diplodactylidae). Numbers in parentheses beside virus names indicates  
249 the number of variants of that virus detected (where >1). Note that all the *Amnoonviridae*  
250 belong to currently unclassified genera, but may represent more than one genus.

251

252 A number of other vertebrate-associated viral families were detected, but were determined as  
253 likely endogenous virus elements (EVEs) because longer contigs had disrupted open reading  
254 frames. These included members of the *Adintoviridae*, *Hepadnaviridae*, *Retroviridae*, and  
255 *Circoviridae*, and were excluded from abundance and alpha diversity analyses. Of note,  
256 library CSex\_M (comprising *Carlia sexdentata*) did not contain any biologically relevant  
257 viruses, aside from some likely EVEs, but did contain some viruses that are not associated  
258 with vertebrates (Figure S1). Across all libraries, we detected several viral groups that were  
259 unlikely to be associated with vertebrate infection, representing the *Permutotetraviridae*,  
260 *Chuviridae*, *Tectiviridae*, *Mimiviridae*, *Autolykiviridae*, *Baculoviridae*, unclassified  
261 Ortervirales, unclassified Riboviria, and tombus-like, solemo-like, narna-like, partiti-like, and  
262 toti-like viruses. None of these viruses were abundant (Figure S1) and were considered likely  
263 to be viruses of commensal organisms in the lizard livers (i.e., narna-like) or contaminants.  
264 Only vertebrate-associated viral families are included in the analyses described below.

265

### 266 **3.2 Abundance and diversity of lizard viruses**

267 To help determine the factors influencing virome diversity, we compared the abundance and  
268 alpha diversity in biologically relevant viruses between libraries from different lizard species  
269 and sampling regions. Specifically, we considered host taxonomy (at the level of infraorder  
270 and family) as well as a range of ecological variables, including habitat, environment and  
271 range size (Csex\_M was excluded from these analyses as it was the only riparian library and  
272 no biologically relevant viruses were found in this library). Given variability in the number of  
273 individuals per pool, we first assessed the effect of the number of samples per pool/library to  
274 account for any bias introduced by sampling strategy. The number of samples per pool  
275 correlated with the Richness ( $p=0.037$ ) and Shannon diversity ( $p=0.015$ ), but not the  
276 abundance ( $p=0.140$ ) of vertebrate viruses, or the Shannon Effective ( $p=0.052$ ), Simpson  
277 ( $p=0.434$ ) or Simpson Effective diversity ( $p=0.077$ ) (Figure S2). As such, the number of

278 samples per pool was considered in all statistical models, and included as cofactors in final  
279 models addressing Richness and Shannon diversity.

280

281 Host taxonomy and habitat were consistently important parameters in the best-fit models for  
282 all diversity measures regardless of the level of taxonomy considered, indicating that these  
283 factors are important modulators of viral diversity in this sample. Taxonomy had a  
284 statistically significant effect on viral richness regardless of taxonomic level (host infraorder  
285  $p=0.030$ , family  $p=0.002$ ; Figure 2A and 2C), but was not significant in modulating  
286 abundance or Shannon and Simpson indexes (Figure S3). Habitat significantly modulated  
287 richness and Shannon index diversity when considering host infraorder ( $p=0.049$  and  
288  $p=0.025$ , respectively) and host family ( $p=0.002$  and  $p=0.048$ ; Figure 2B and 2D), and also  
289 had a significant effect on the Simpson index of diversity, but only when considering host  
290 infraorder ( $p=0.037$ ; Figure S4). Range size was significant in the best-fit model for richness,  
291 regardless of the taxonomy level explored (host infraorder  $p=0.049$ , host family  $p=0.002$ ).

292

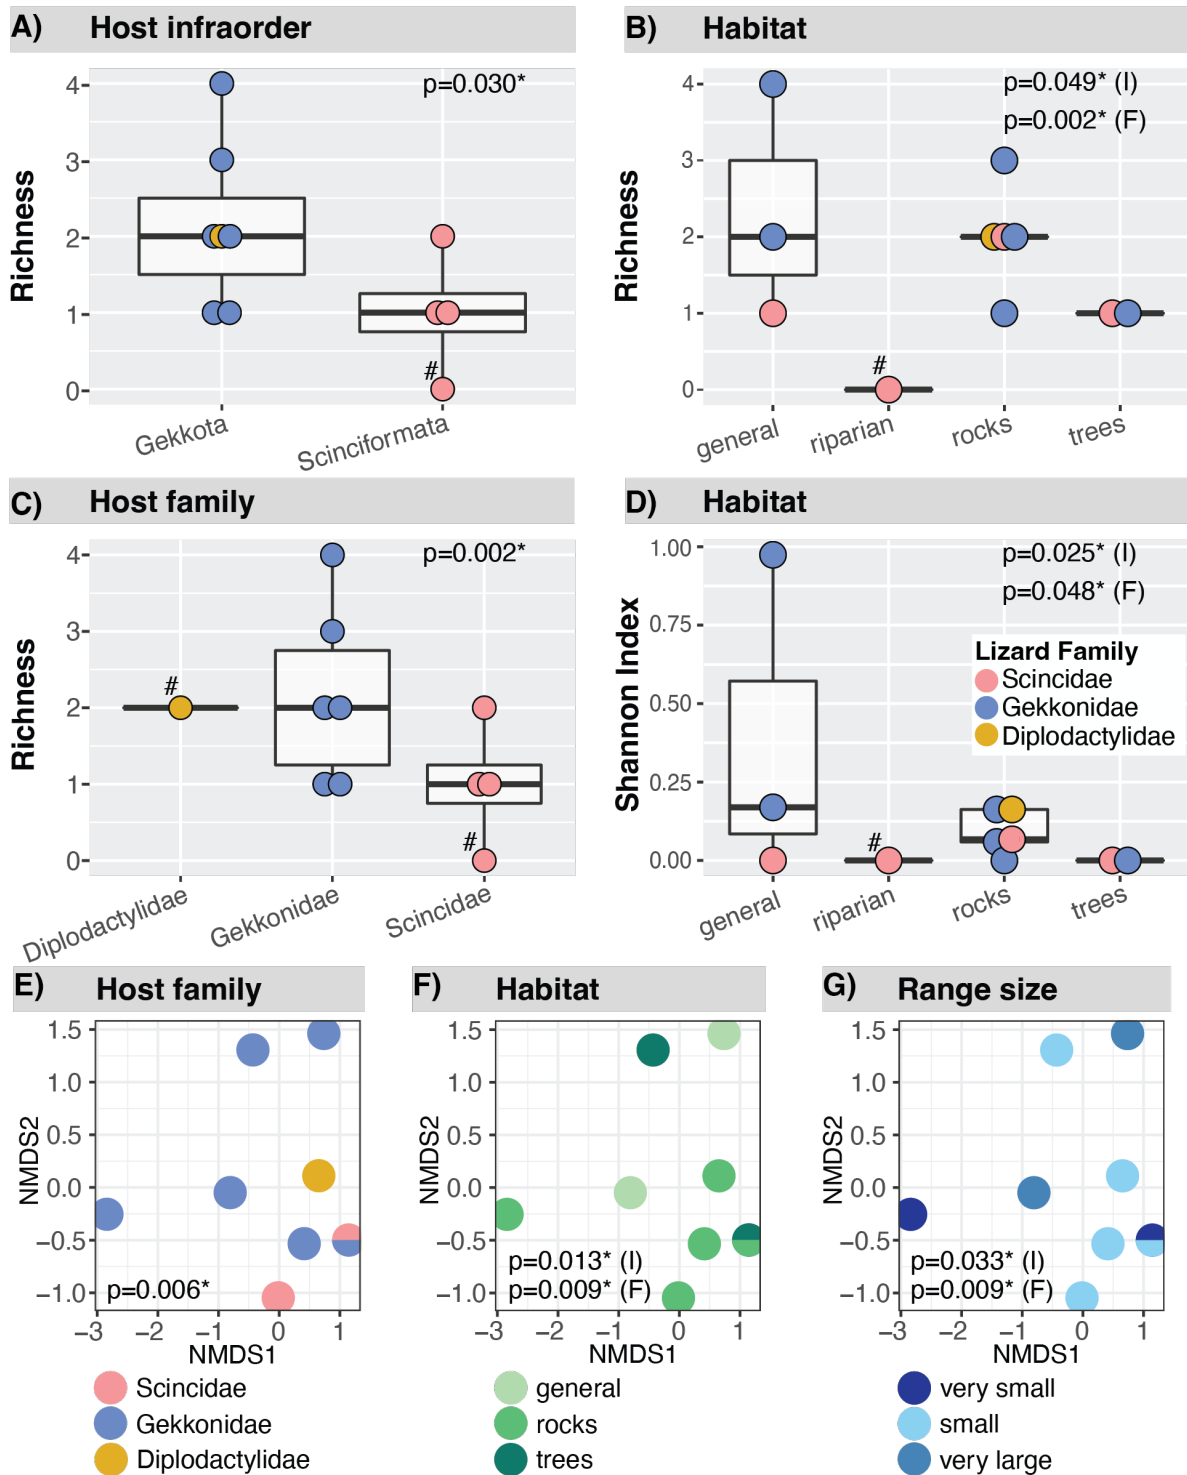

293  
294

295 **Figure 2. Diversity of biologically relevant viruses by host taxonomic and ecological**  
 296 **variables.** (A—D) viral alpha diversity plots: (A) viral richness according to host infraorder;  
 297 (B) viral richness according to lizard habitat type; (C) viral richness according to host family;  
 298 (D) Shannon index according to host habitat. Points are coloured by host family. Host  
 299 taxonomic levels comprising only a single library were included in plots for visualisation  
 300 only and excluded from the final statistical models (denoted by a # in host taxonomy alpha  
 301 diversity plots). Csex\_M was not included in statistical models or beta diversity plots as no  
 302 biologically relevant viruses were found in this library and it was the only riparian library.

303 (E—G) viral beta diversity NMDS plot coloured by: (E) host family, (F) host habitat, and (G)  
304 host range size. Cmet\_M and Gnan\_A overlap, depicted by a half circle. In all plots, P-values  
305 for habitat or range size when considered with taxonomy at the level of host infraorder are  
306 indicated with an “I”, while those considered with taxonomy at the level of host family are  
307 indicated with an “F”. P-values <0.05 were considered significant and indicated with an  
308 asterisk.  
309

310 We also explored beta-diversity in relation to host traits (Figure 2E-G and Figure S5). A  
311 similar trend to alpha diversity was observed, in which taxonomy, habitat and range size were  
312 statistically significant in models considering host family (host family  $p=0.006$ , habitat  
313  $p=0.009$ , range size  $p=0.009$ ), as was habitat and range size in models considering host  
314 infraorder ( $p=0.013$  and  $0.033$ , respectively). Overall, we documented a general trend of host  
315 taxonomy, habitat and range size as potential modulators of viral diversity.  
316

316

### 317 **3.3 Evolutionary relationships of novel viruses**

#### 318 *3.3.1 Flaviviridae*

319 Strikingly, most of the *Flaviviridae* identified in the lizards studied here fell within the genus  
320 *Hepacivirus*. The Australian lizard hepaciviruses were all novel and fell into three clades in a  
321 host specific manner (Figure 4). Hepaciviruses from *Carlia amax* formed a monophyletic  
322 group with a viviparous lizard hepacivirus from *Zootoca vivipara* (Lacertidae) sampled in the  
323 UK (Scotland), and a Gecko hepacivirus previously sampled from *Oedura* in Australia  
324 (although the RdRp sequence from the Gecko hepacivirus was only 92 amino acid residues,  
325 necessarily impacting phylogenetic accuracy). In addition, the long branch lengths suggest  
326 substantial unsampled genetic diversity within this clade. While this clade has strong support,  
327 its specific phylogenetic placement within the hepaciviruses is poorly resolved such that its  
328 closest relatives are unclear (Figure 4). *Gehyra nana* had a high diversity of hepaciviruses,  
329 with viral sequences clustering into two groups: one distinct lineage that broadly clustered  
330 with mammalian viruses and a second that grouped with reptile and bird viruses (Figure 4).  
331 Viruses in the avian/reptile lineage grouped with viruses from other Gekkota species sampled  
332 in China, including a *Goniurosaurus luyi* (Gekkota; Eublepharidae, AVM87252.1),  
333 *Hemidactylus bowringii* (Gekkota; Eublepharidae, AVM87554.1) and a *Teratoscincus*  
334 *roborowskii* (Gekkota; Sphaerodactylidae, AVM87251.1). This is consistent with the Asian  
335 origins of *Gehyra* (Oliver and Hugall 2017). Viruses from the *Oedura marmorata* sampled in  
336 this study formed their own clade within the avian/reptile host lineage, basal to those from  
337 China and *G. nana*.

338  
339  
340  
341  
342  
343  
344  
345  
346

Interestingly, the *Flaviviridae* identified in the *Cryptoblepharus metallicus* library did not cluster with the other Australian lizard *Flaviviridae*, but rather with Tanama bat virus and Lumpfish flavivirus (Figure 4), which are part of a broad “flavi-like” group that are phylogenetically distinct from members of the genus *Orthoflavivirus*. The long branch lengths between these three viruses suggest that there is considerable unsampled viral diversity in this clade, and that this constitutes a new virus that we have tentatively named Bebevirus.

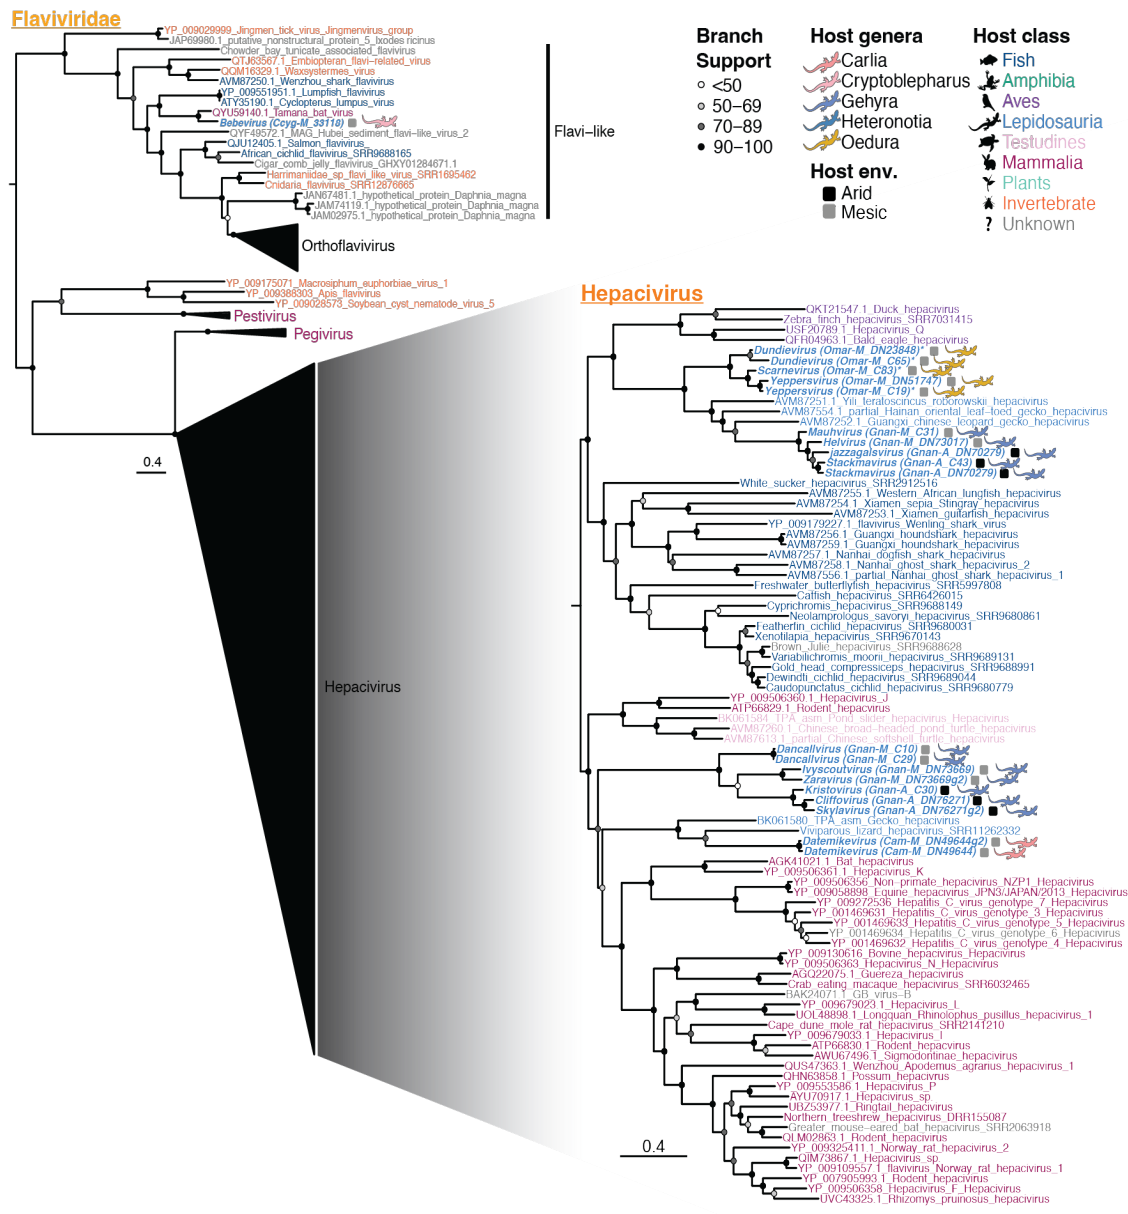

347  
348  
349  
350

**Figure 3. Maximum likelihood phylogeny of the RdRp of *Flaviviridae* in Australian lizards.** Taxon names are coloured according to apparent host. Viruses discovered in this



351 study are indicated by bold and italicized taxa names and lizard silhouettes beside taxa  
352 names, coloured by host genus. Squares next to the taxa names indicate the sampling  
353 location/environment (env.) for viruses discovered in this study. An asterisk beside the taxa  
354 name for viruses detected here indicates that the sequence is not the complete length of the  
355 alignment. The accession number is indicated in the taxon name for sequences downloaded  
356 from NCBI. Circles at the nodes represent the branch support as estimated using the SH-like  
357 approximate likelihood ratio test. Trees are mid-point rooted for clarity. Scale bars indicate  
358 the number of amino acid substitutions per site. To achieve greater resolution, the  
359 *Hepacivirus* phylogeny was estimated from a sequence alignment of this genus only.  
360

### 361 3.3.2 Picornaviridae

362 Members of the *Picornaviridae* were found in all Gekkota species analyzed, with the  
363 exception of *H. planiceps* (although a picornavirus contig from *O. marmorata* was excluded  
364 from the phylogeny as there were no RdRp contigs of sufficient length). The picornaviruses  
365 isolated from lizards in this study fell into two main groups. Viruses from *H. binoei* and *G.*  
366 *nana* grouped together and shared a common ancestor with bat picornavirus (AIF74248.1;  
367 53.5-62% amino acid [aa] identity) and Chameleon picornavirus 1 (DAZ91100; 50-58.7% aa  
368 identity) (Figure 4), a virus found in multiple lizard species including *Kinyongia boehmei*  
369 (Chamaeleonidae), *Podarcis muralis* (Lacertidae), and *Timon pater* (Lacertidae). Bat  
370 picornavirus is a member of the genus *Shanbavirus*, and (based on identity in the RdRp) the  
371 *H. binoei* and *G. nana* viruses, as well as Chameleon picornavirus 1, should also belong to  
372 the shanbaviruses (<https://ictv.global/report/chapter/picornaviridae/picornaviridae>). Three  
373 distinct *Shanbavirus* species were identified in this study, provisionally named Halpervirus  
374 (*G. nana* host), Schrutevirus (*G. nana* host), and Beeslyvirus (*H. binoei* host). Notably,  
375 Beeslyvirus was found in *H. binoei* from both mesic and arid environments and was the only  
376 virus found in more than one library.  
377

378 The second group contained the *G. arnhemica* picornavirus sequences, which were closely  
379 related and hence assigned as the same virus species, here provisionally named Kapoorvirus.  
380 This virus was most closely related to worm lizard picornavirus (57.6% aa identity in the  
381 RdRp) from *Blanus cinereus* (Blanidae) and more broadly related to members of the genus  
382 *Tremovirus* (Figure 4), associated with reptiles and birds, and known to cause  
383 encephalomyelitis in avian hosts. The Kapoorviruses shared 34.3-41.6% amino acid identity  
384 in the RdRp with the *Tremoviruses* included in the phylogeny, which placed them on the  
385 border of the level of divergence required for a new genus (64% divergence). As such, we  
386 have tentatively placed them within the genus *Tremovirus*.  
387

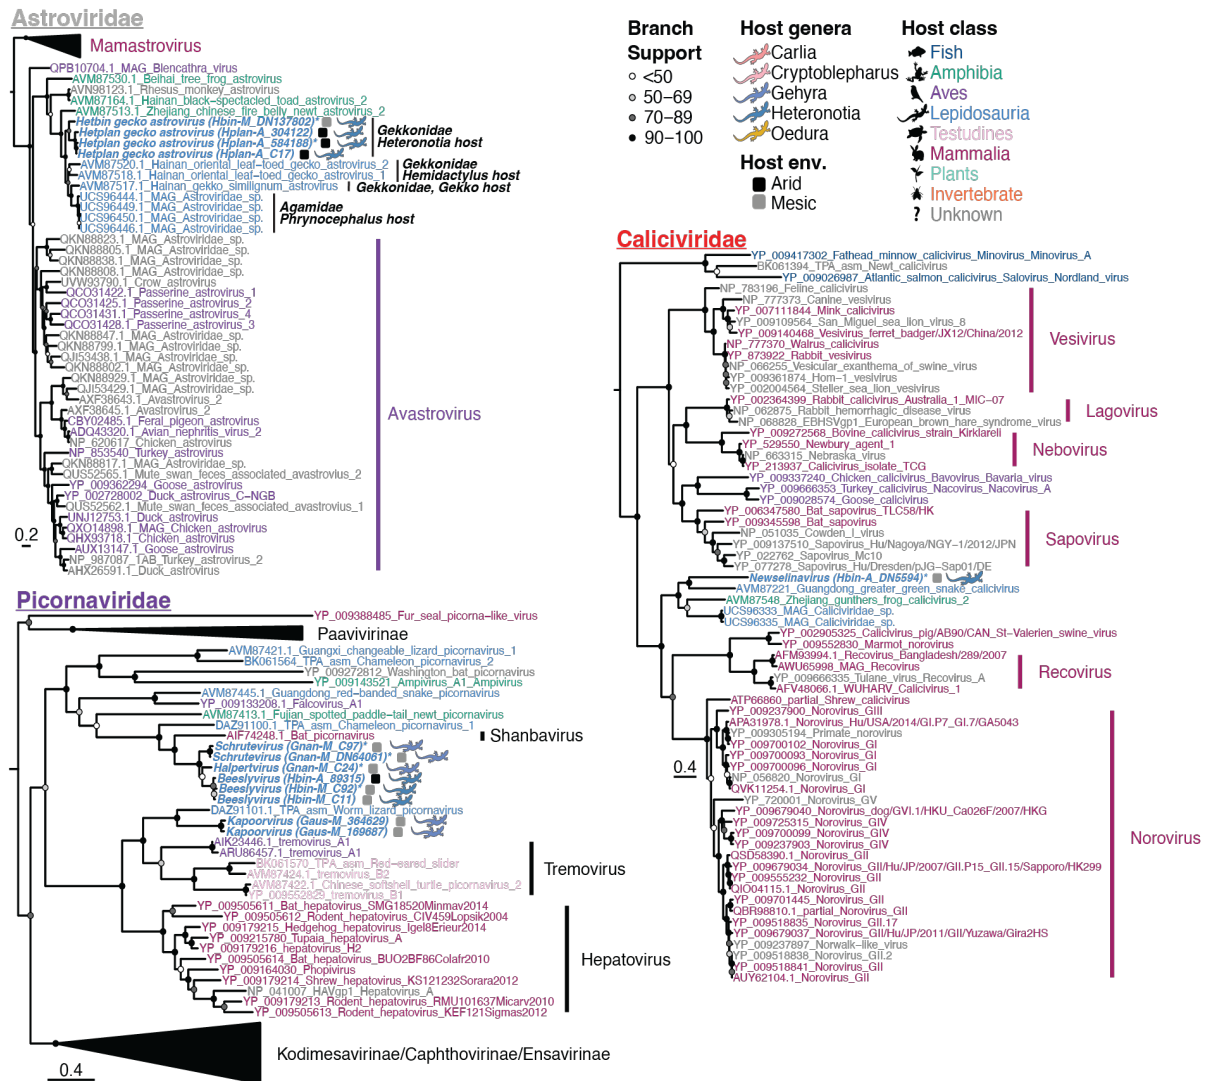

388  
389

390 **Figure 4. Maximum likelihood phylogenies of the RdRp of positive-sense RNA viruses**  
391 **in Australian lizards (with the exception of the *Flaviviridae*, shown in Figure 3). Taxon**  
392 **names are coloured according to apparent host. Viruses discovered in this study are indicated**  
393 **by bold and italicized taxa names and lizard silhouettes beside taxa names, which are**  
394 **coloured by host genus. Squares next to the taxa names indicate the sampling**  
395 **location/environment for viruses discovered in this study. An asterisk beside the taxa**  
396 **name for viruses detected here indicates that the sequence is not the complete length of the**  
397 **alignment. The accession number is indicated in the taxon name for sequences downloaded**  
398 **from NCBI. Circles at the nodes represent the branch support as estimated using the SH-like**  
399 **approximate likelihood ratio test. Trees are mid-point rooted for clarity. Scale bars indicate**  
400 **the number of amino acid substitutions per site. Host family and genus names are indicated**  
401 **for the Lepidosauria in the *Astroviridae* phylogeny to demonstrate virus-host co-divergence**  
402 **within the Lepidosauria.**

403

### 404 3.3.3 *Astroviridae*

405 Members of the *Astroviridae* were detected in two *Heteronotia* libraries from two different  
406 species – *H. binoei* and *H. planiceps*. A distinct astrovirus was identified in each library,

407 designated as Hetplan gecko astrovirus (from *H. planiceps*) and Hetbin gecko astrovirus  
408 (from *H. binoei*), and the two viruses grouped together in the RdRp phylogeny (Figure 4).  
409 These viruses then grouped more broadly with a larger well-supported clade of viruses from  
410 lizards (Figure 4), clustering in a fashion reflective of host family and genus. Specifically, the  
411 viruses from *Heteronotia* grouped closely with viruses from other members of the  
412 Gekkonidae, including *Hemidactylus bowringii* and *Gekko similignum*, with each also  
413 clustering by host genus, all of which fell basal to a clade of viruses from Agamidae  
414 (*Phrynocephalus erythrurus* and *Phrynocephalus theobaldi*), mirroring the host phylogeny  
415 (Figure 4). Genus demarcation criteria for the *Astroviridae* is unclear and is most strongly  
416 associated with host species. As a consequence, the viruses found here, along with the  
417 published lizard astroviruses, would most likely form their own genus. It is also notable that  
418 the lizard astrovirus cluster grouped more broadly with viruses found in amphibians and  
419 birds.

420

#### 421 3.3.4 *Rhabdoviridae*

422 Viral contigs related to the *Rhabdoviridae* were identified in two libraries (Figure 1). The *H.*  
423 *binoei* rhabdovirus fell with a group of viruses not classified to any genus, including those  
424 isolated from ray-finned fishes (*Actinopterygii*; from liver, gut and gills), and a spotted  
425 paddle-tail newt (*Pachytriton brevipes*; from gut) (Figure 5). This virus is highly divergent  
426 (49% aa identity in the RdRp to the closest relative, Wenling dimarhabdovirus 9) and would  
427 therefore represent a new species, that we have named *Heteronotia binoei* rhabdovirus. This  
428 virus, together with Wenling dimarhabdovirus 9, Fujian dimarhabdovirus, and Wenling  
429 dimarhabdovirus 1, should form at least one new genus based on the observed level of  
430 sequence diversity. This group of unclassified viruses then fell as a sister-group to a large  
431 clade of rhabdoviruses including lyssavirus and many other pathogenic viruses (Figure 5).  
432 Only short *Rhabdoviridae* contigs could be obtained for the RdRp region from the *G. nana*  
433 library (Gnan\_M), the longest being 124 residues. A phylogeny was estimated using a  
434 smaller region of the RdRp (230 aa after trimAl trimming) where this contig aligned to  
435 confirm the phylogenetic groupings observed in the larger alignment (774 aa after trimAl  
436 trimming). Regardless of the RdRp alignment used, the *G. nana* rhabdovirus grouped with  
437 the *Sripuviruses* (Figure 5). It shared 75% identity in the RdRp protein to its closest relative –  
438 Almpiwar virus, isolated from skinks in Northern Queensland Australia. As all RdRp contigs  
439 from Gnan\_M (including the one in the phylogeny) exhibited less than 90% amino acid

440 identity to the closest relative, this virus likely represents a new species of *Sripuvirus*,  
 441 tentatively named *Gehyra nana rhabdovirus*.

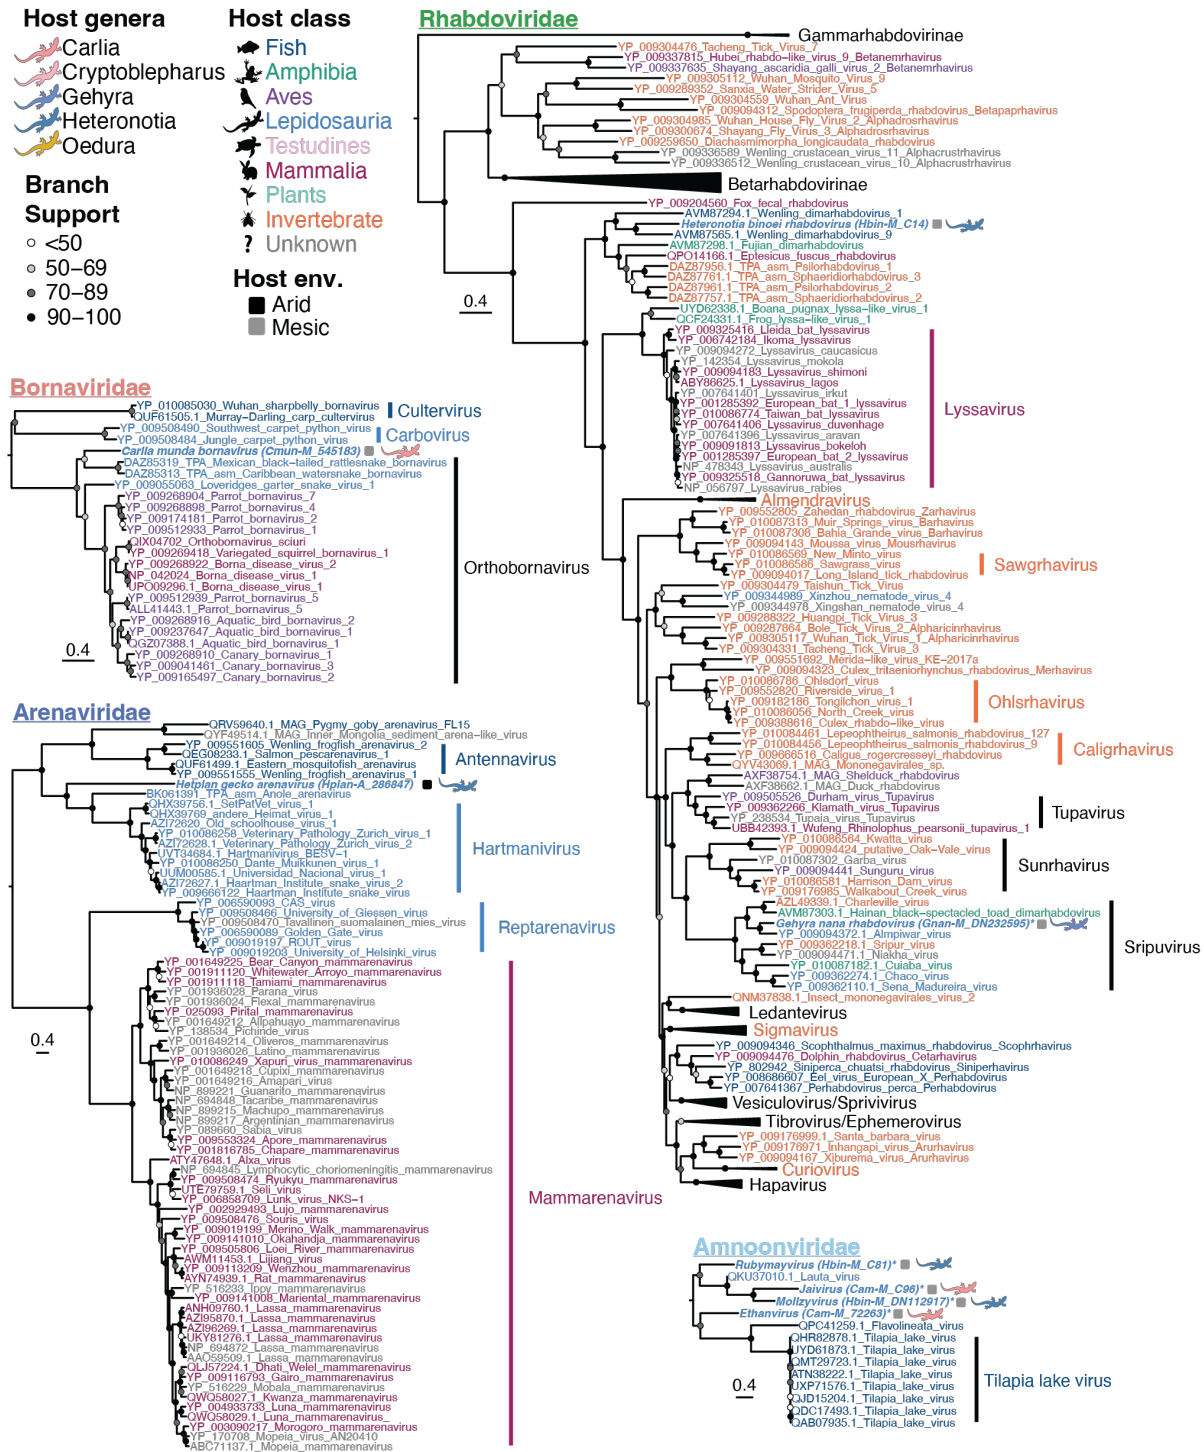

442  
 443  
 444 **Figure 5. Maximum likelihood phylogenies of the RdRp of negative-sense RNA viruses**  
 445 **in Australian lizards.** Taxon names are coloured according to apparent host. Viruses  
 446 discovered in this study are indicated by bold and italicized taxa names and lizard silhouettes  
 447 beside taxa names, which are coloured by host genus. Squares next to the taxa names indicate  
 448 the sampling location/environment (env.) for viruses discovered in this study. An asterisk  
 449 beside the taxa name for viruses detected here indicates that the sequence is not the complete  
 450 length of the alignment. Accession numbers are indicated in the taxon name for sequences

451 downloaded from NCBI. Circles at the nodes represent the branch support as estimated using  
452 the SH-like approximate likelihood ratio test. Trees are mid-point rooted for clarity. Scale  
453 bars indicate the number of amino acid substitutions per site.

454

### 455 3.3.5 *Amnoonviridae*

456 Several contigs related to Lautavirus (MT386081), a member of the *Amnoonviridae*, were  
457 identified in *C. amax* and *H. binoei* sampled from the same area of the north-east Top End.  
458 However, the contigs obtained were short and hence difficult to classify. The amino acid  
459 sequence identity between the longest contigs (270 aa and 238 aa) from the two libraries is  
460 only 26.7%, while the identity of the longest contigs from *C. amax* and *H. binoei* with the  
461 nearest published relative (MT386081, Lautavirus) were 31.3% and 35.8%, respectively.  
462 The nearest known relative, found in an Australian gecko (*Gehyra lauta*) liver in 2013 (Ortiz-  
463 Baez et al. 2020), is itself highly divergent from other published viruses, and was only  
464 detected using a protein structure prediction approach. All *Amnoonviridae* contigs detected in  
465 this study were from the RdRp segment as these viruses are so distinct from known viruses  
466 that it was challenging to identify other genomic regions, particularly as these viruses are  
467 likely to be segmented. Phylogenetic analysis of the RdRp of contigs longer than 100 aa from  
468 each library suggested that there were four distinct species of lizard virus within  
469 *Amnoonviridae*, two in each library (Figure 5). Three of these species clustered with Lautavirus  
470 virus, creating a lizard-infecting clade, while the fourth was basal (yet quite distant) to a clade  
471 of fish viruses, including Tilapia lake virus (Figure 5). However, the clustering of these  
472 contigs may be unreliable since they are short (160 – 270 aa) and not the complete length of  
473 the RdRp. Additionally, contigs from the same library did not overlap (or only overlapped  
474 minimally) in the alignment and therefore their relationship is difficult to determine.

475

### 476 3.4 Viral families in which a single species was identified

477 A single virus species was detected in the lizard metatranscriptomes from the *Caliciviridae*,  
478 *Arenaviridae*, *Bornaviridae*, and *Iridoviridae*. A member of the *Caliciviridae* was detected in  
479 the *H. binoei* (Hbin\_A) (Figure 1), but only partial contigs were obtained which aligned to  
480 most of the capsid, parts of the RdRp, 2C-like protein and the proteinase. Alignment of a 449  
481 aa region of the RdRp with published sequences grouped this virus with caliciviruses from  
482 other squamates; *Cyclophiops major* (Colubridae), *Phrynocephalus theobaldi* (Agamidae),  
483 and a frog, *Sylvirana guentheri* (Ranidae) (Figure 4). The *H. binoei* calicivirus was highly  
484 divergent from its closest relative – Guangdong greater green snake calicivirus (AVM87221)  
485 – sharing only 35.4% identity in the aligned region of the RdRp. We therefore suggest that it

486 comprises a new species that we have tentatively named Newselinavirus. Based on alignment  
487 of the near complete major capsid protein (527 aa), this virus has >60% amino acid sequence  
488 difference to other caliciviruses and therefore would also constitute a different genus  
489 (<https://ictv.global/report/chapter/caliciviridae/caliciviridae>).

490  
491 A member of the *Arenaviridae* was detected in *H. planiceps* (Hplan\_A) with the highest  
492 abundance of any virus detected in this study (>0.2% of total reads for that library, Figure 1)  
493 with a near complete genome obtained. This virus clusters with the *Hartmaniviruses* (Figure  
494 5), a genus known to infect snakes with unknown pathogenicity, although with only 23.6% aa  
495 identity to its closest relative in the RdRp region. However, based on the genus demarcation  
496 criteria for *Arenaviridae* (i.e., members of the same genus share >35% nucleotide identity in  
497 the L gene; <https://ictv.global/report/chapter/arenaviridae/arenaviridae>), this virus falls just  
498 within the genus *Hartmanivirus*. Like other members of this genus, the virus detected here,  
499 tentatively named Hetplan gecko arenavirus, lacked the gene encoding the zinc-binding  
500 matrix protein (Hepojoki et al. 2015).

501 A near-complete genome of a member of the *Bornaviridae* was found in the *C. munda* library  
502 (Cmun\_M). Phylogenetic analysis of the RdRp showed that it formed a clade with two snake  
503 viruses from the genus *Orthobornavirus* which also contained Loveridges garter snake virus  
504 1 (YP\_009055063) and viruses with mammalian and avian hosts (Figure 5). As it shared only  
505 53.5% nucleotide identity across the entire genome with its nearest relative, the virus detected  
506 here would constitute its own species (Kuhn et al. 2015), tentatively named *Carlia munda*  
507 bornavirus, and would likely belong to the genus *Orthobornavirus*. It is not clear whether the  
508 two snake viruses that grouped with *Carlia munda* bornavirus are pathogenic (Pfaff and  
509 Rubbenstroth 2021), but other members of the *Orthobornavirus* clade cause neurotropic  
510 disease in mammals and avian hosts, while members of the *Carbovirus* genus cause  
511 neurological disease in snakes (Hyndman et al. 2018).

512 Transcripts from multiple genes related to the *Iridoviridae* (double-strand DNA viruses) were  
513 detected in *H. binoei* (Hbin\_M) (Figure 1), including the major capsid, myristylated  
514 membrane protein, phosphotransferase, ATPase, DNA helicase, dUTP, and NTPase I. This  
515 suggested that an *Iridoviridae* was actively replicating in one or more lizards sampled in this  
516 library. Phylogenetic analysis of the major capsid protein revealed that this virus clustered  
517 within the subfamily *Betairidovirinae* that was originally considered invertebrate-specific but  
518 which is increasingly being associated with vertebrate infection (Russo et al. 2021) (Figure  
519 6). Interestingly, this virus grouped with erythrocytic necrosis virus, a pathogen of fish  
520 (72.4% aa identity in the capsid), and *Rhinella marina* erythrocytic-like virus found in cane

521 toads (85.4% aa identity) and would likely fall into the same genus  
 522 (<https://ictv.global/report/chapter/iridoviridae/iridoviridae>), but as a novel species that we  
 523 have named *Heteronotia binoei* irido-like virus (Figure 6). A new genus containing these and  
 524 erythrocytic viruses of ectothermic hosts has been putatively proposed, but not yet formally  
 525 ratified or named (Emmenegger et al. 2014). Three other erythrocytic viruses from Squamata  
 526 hosts – *Thamnophis sauritus* erythrocytic virus (EV), *Lacerta monticola* EV, and *Pogona*  
 527 *vitticeps* EV – fell within this erythrocytic virus lineage based on sequence of a short PCR  
 528 product of a homolog to a region of the DNA dependent DNA polymerase (Grosset et al.  
 529 2014; Russo et al. 2018), although the transcript encoding this particular protein was not  
 530 found in our data, precluding a phylogenetic analysis. However, it is likely the virus  
 531 discovered here is a relative to the other Squamata erythrocytic viruses and supports the  
 532 presence of Squamata hosts for this lineage.  
 533

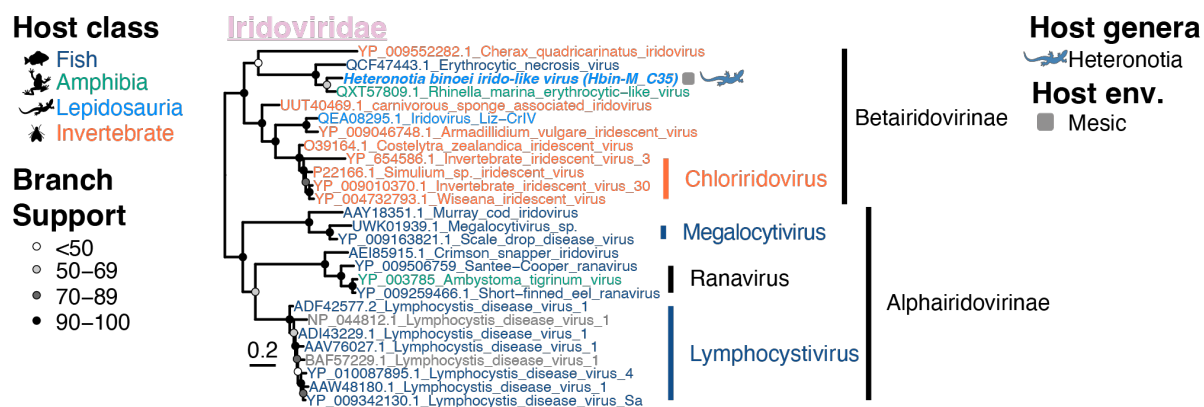

534  
 535  
 536 **Figure 6. Maximum likelihood phylogenetic tree of the major capsid protein of the**  
 537 ***Iridoviridae* in Australian lizards.** Taxon names are coloured according to apparent host.  
 538 The virus discovered in this study is indicated by a bold and italicized taxon name and a  
 539 lizard silhouette beside the taxon name, which is coloured by host genus. The square next to  
 540 the taxon name indicates the sampling location/environment (env.) for the virus discovered in  
 541 this study. The accession number is indicated in the taxon name for sequences downloaded  
 542 from NCBI. Circles at the nodes represent the branch support as estimated using the SH-like  
 543 approximate likelihood ratio test. The tree is mid-point rooted for clarity, and the scale bar  
 544 indicates the number of amino acid substitutions per site.  
 545

#### 546 4. Discussion

547 We used Australian lizards as model organisms to better understand the host determinants of  
 548 viral abundance and diversity, while simultaneously expanding our knowledge of the lizard  
 549 virome and virus evolution. Indeed, to date relatively little attention has been paid to the  
 550 viromes of squamates (lizards and snakes) (Shi et al. 2018; Harding et al. 2022). In Australia,  
 551 the Squamata are the most species-rich vertebrate assemblage (Wilson and Swan 2017) and  
 552 the varied ages of Squamate radiations (Brennan and Oliver 2017), alongside their varied

553 population structures and their adaption to multiple habitats and environments (Pianka 1969;  
554 Pianka 1973), makes them an informative group to study in the context of viral evolution and  
555 ecology. Using a meta-transcriptomics approach we characterized the virome of nine lizard  
556 species from three families and five genera, finding a wide diversity of novel viruses,  
557 including those from families/genera that commonly cause disease in humans and other  
558 animals, including the *Flaviviridae* (*Hepacivirus*), *Bornaviridae*, *Rhabdoviridae*, and  
559 *Picornaviridae*. Our findings expand many known viral families, adding entire new clades.  
560 This includes a new lizard-specific clade of the *Amnoonviridae*, a family previously  
561 containing only fish viruses and a single lizard-infecting virus (Ortiz-Baez et al. 2020).

562

563 Viral diversity and abundance differed markedly between hosts, and consistent with other  
564 studies on virome and pathogen ecology, environmental variables had some effect on virome  
565 diversity across our sampled hosts – particularly host habitat. The effect of various habitats  
566 on alpha diversity in viruses has previously been demonstrated in fish (Geoghegan et al.  
567 2021), rodents (Tirera et al. 2021), and bats (Bergner et al. 2020), while virome composition  
568 has also been shown to differ significantly in different habitats for bats, shrews and rats  
569 (Chen et al. 2023). As different habitats have a range of environmental factors that modulate  
570 host behavior and ecology, it is unsurprising that host habitat may also impact virome  
571 composition. For example, foraging behavior is likely to play a role in the transmission of  
572 low pathogenic avian influenza, where avian species that forage in shallow water are more  
573 likely to influence avian influenza ecology (Wille et al. 2023).

574

575 Host taxonomy also impacted measures of virus richness and beta diversity, consistent with  
576 some degree of host-specific virus evolution, including co-divergence. The effect of host  
577 taxonomy on viral diversity is similar to that seen in fish (Geoghegan et al. 2021) and  
578 mammalian viromes (Olival et al. 2017), although a different pattern was observed in some  
579 bird viromes (Wille et al. 2018, 2019), suggesting that it is dependent on the taxa in question.  
580 Over evolutionary time the likelihood of successful cross-species virus transmission is  
581 predicted to decline because of host genetic differences in viral receptors, the cellular  
582 machinery required for replication, immune response and other factors that affect viral  
583 infection and spread (Ferris, Heise and Baric 2016). This may in part explain the link  
584 between host taxonomy and viral richness and composition. Alternatively, this association  
585 could simply reflect virome-level virus-host co-divergence over longer evolutionary  
586 timescales. Indeed, in most cases, the lizard viruses discovered here grouped together and/or



587 with viruses found in other members of the reptilian class Lepidosauria, and phylogenies  
588 generally followed a broad pattern of host-virus co-divergence. For example, in the case of  
589 the *Astroviridae*, virus sequences from Squamata clearly group by host genera, and viruses  
590 from the Gekkonidae fall basal to those from the Agamidae, matching the host phylogeny  
591 (Oliver and Hugall 2017). Similarly, in the case of the relatively well-sampled hepaciviruses  
592 and picornaviruses, more closely related Squamata hosts tended to carry more closely related  
593 viruses, with viruses from the same host species forming a monophyletic group and viruses  
594 from the same family and infraorder similarly tending to do the same.

595  
596 As well as providing some evidence for virus-host co-divergence, we documented many  
597 instances of virus-host jumping or multi-host viruses at higher taxonomic scales. Indeed, in  
598 some cases, lizard viruses clustered more closely with amphibian, mammalian or fish viruses,  
599 rather than with other reptile or bird viruses. Three distinct clades of lizard hepaciviruses  
600 were identified, all of which group separately to a clade of turtle hepaciviruses. Although the  
601 hepacivirus phylogeny is difficult to resolve, the presence of four clades of reptile  
602 hepaciviruses and the placement of two reptile clades within the mammalian hepacivirus  
603 clade is suggestive of host jumping between reptiles and mammals at some time in the distant  
604 evolutionary past. Similarly, the *Iridoviridae* and *Rhabdoviridae* phylogenies are highly  
605 incongruent with their host phylogenies, suggesting frequent host jumping. In the case of the  
606 two lizard *Rhabdoviridae*, one groups with fish viruses while the other clusters in the  
607 *Sripuvirus* clade with viruses from reptiles, amphibians and invertebrates. The closest relative  
608 of the *Sripuvirus* detected here, Almpiwar virus, was isolated from skinks in Northern  
609 Queensland Australia, and neutralizing antibodies against Almpiwar virus were also found in  
610 the sera of crocodiles, a wild bird and multiple mammalian hosts, including a human  
611 (McAllister et al. 2014). Although, the presence of neutralizing antibodies against Almpiwar  
612 virus in mammals was relatively rare, it does suggest that this group of viruses could have a  
613 broader host range than reptiles alone. In addition, there is evidence that this virus, along with  
614 other members of this genus – including Charleville virus, which was also isolated in  
615 Australia from *Gehyra* (the same host genus as the virus detected here) and sandflies – are  
616 arthropod-borne (McAllister et al. 2014; Vasilakis et al. 2019). The lizard *Iridoviridae* found  
617 was most closely related to an amphibian and fish virus, with a relatively short genetic  
618 distance between them. This is perhaps unsurprising as recent host jumping seems to be  
619 commonplace within the *Iridoviridae*; some members of this family can infect fish, reptiles  
620 and amphibians (Brenes et al. 2014), and some invertebrate-infecting *Iridoviridae* can also

621 apparently infect vertebrates (Papp and Marschang 2019). In sum, this work supports a model  
622 of frequent host-jumping throughout the evolutionary history of most virus families on a  
623 backdrop of virus-host co-divergence (Geoghegan, Duchêne and Holmes 2017; Geoghegan  
624 and Holmes 2017; Shi et al. 2018).

625

626 Our phylogenetic analyses also revealed some geospatial clustering. For virus families with  
627 multiple detections, there is little overlap of virus species from different environments. This  
628 suggests that lizard viruses are evolving within their host populations in a relatively isolated  
629 manner, as might be expected given the generally strong phylogeographic structuring across  
630 species ranges (Moritz et al. 2016; Moritz et al. 2018; Potter et al. 2018). It is also of interest  
631 that phylogenetic groups that contain viruses sampled from both mesic and arid locations  
632 tend to have mesic associated viruses in the basal positions. The hepacivirus phylogeny is  
633 particularly enlightening in this respect and it suggests the movement of viruses from one  
634 environment to another: both clades of *G. nana* hepaciviruses have viruses collected from  
635 mesic environments located in basal phylogenetic positions to those viruses sampled from  
636 animals in arid environments. This is consistent with the theory that Australia's mesic  
637 terrestrial biota is mostly ancestral (Byrne et al. 2011). Additionally, more consistent mesic  
638 conditions may favor the retention of viral diversity, such that younger taxa dominate in the  
639 more climatically variable arid regions of the Kimberley. This could also be associated with  
640 the more variable demographic histories of the drier Kimberley compared to the mesic Top  
641 End populations (Potter et al. 2018).

642

643 The hepacivirus phylogeny also reflects host historical biogeography. As >90% of Australian  
644 reptiles are endemic (Chapman 2009), it is expected that viruses infecting Australian reptiles  
645 would have minimal opportunities to spread between countries. Indeed, even the currently  
646 limited sampling of lizard viruses demonstrates little movement between countries. However,  
647 in one clade of hepaciviruses, viruses from Australian *O. marmorata* hosts were separated  
648 from viruses from Australian *G. nana* by viruses sampled from China, with the Chinese  
649 sampled viruses falling as sister taxa to the Australian *G. nana* viruses. Interestingly, *O.*  
650 *marmorata* are thought to have Gondwanan origins, while the *G. nana* are believed to have  
651 immigrated from Asia around the Eocene-Oligocene transition (Oliver and Hugall 2017).  
652 Thus, this clade of hepaciviruses could reflect the historical biogeography of their hosts, with  
653 evidence of a lineage of viruses introduced to Australia within immigrant ancestors. As the  
654 evolutionary histories of the viruses studied here frequently aligned with the biogeographic

655 and paleoclimatic histories of the hosts, this supports the role of virus evolution in informing  
656 animal host ecological histories where sampling is strategic and sufficiently dense (Wilfert  
657 and Jiggins 2014). Clearly, however, increased sampling across taxa and biogeographic  
658 regions would be useful in confirming this hypothesis.

659

660 Although the disease association, if any, of the viruses collected here is unknown, we did  
661 identify viruses related to known pathogens, including an *Orthobornavirus*, multiple  
662 *Hepaciviruses*, and a member of the *Iridoviridae*. It is noteworthy that seemingly healthy  
663 lizards can carry a very high abundance and richness of viruses in the liver, particularly the  
664 *Gehyra* species (high viral richness) and *H. planiceps* (high abundance). Viral emergence can  
665 have devastating effects on reptile species, such as the Bellinger River snapping turtle that is  
666 now critically endangered following mass mortalities due to a novel nidovirus outbreak  
667 (Zhang et al. 2018). Although it is unclear where the novel nidovirus (with kidney tropism)  
668 originated, the closest known viral relatives were observed in pythons and lizards (usually  
669 associated with respiratory disease) (Zhang et al. 2018). Given that lizards make up 59% of  
670 non-avian reptiles (Pincheira-Donoso et al. 2013), and one fifth of reptile species are  
671 threatened (Cox et al. 2022), this expansion of the lizard virosphere and elucidation of viral  
672 genomic sequences may help inform and prepare for potential threats to reptile species.

673

674 While this work is the first structured examination of the lizard virome, the sample size is  
675 relatively small and there are several caveats. Previous studies have found variation in  
676 viromes depending on the age of the individuals sampled (Bergner et al. 2020) and the time  
677 of year that sampling occurred (Raghvani et al. 2022). These variables were not controlled in  
678 this study. In addition, a larger sample size would enable better comparison between matched  
679 species sampled from different environments and a greater sample across the squamate  
680 phylogeny would expand these results. The viral families detected here are reflective of the  
681 fact that liver samples were sequenced, and as viromes commonly differ by the tissue of  
682 sampling, studying a wider range of tissues would be beneficial. Despite these limitations,  
683 this study demonstrates that lizards carry a large diversity of viruses, often in high abundance  
684 and potentially species-specific. As such they are not only interesting models of vertebrate  
685 evolution and ecology, but also serve as good host models by which to study virus ecology  
686 and evolution. This work further demonstrates that virus evolution may be a useful tool for  
687 understanding or corroborating host biogeographic and paleoclimatic histories.

688

## 689 **Data availability**

690 All raw data (fastq files) generated for this study are available in the NCBI SRA database  
691 under BioProject XXXX, BioSample accessions XXXX. Consensus sequences of assembled  
692 viral contigs presented in phylogenies are available in GenBank under accession numbers  
693 XXXXX-XXXX.

694

## 695 **Acknowledgements**

696 We acknowledge the logistical support provided by Niccy Aitken and Leo Tedeschi at  
697 Australian National University while completing the wet-lab component of this study. We  
698 acknowledge the Sydney Informatics Hub and the University of Sydney's high-performance  
699 computing cluster Artemis for providing the high-performance computing resources that  
700 contributed to the research results reported within this paper.

701

## 702 **Funding**

703 This work was supported by an Australian Research Council Australian Laureate Fellowship  
704 awarded to E.C.H. (grant number FL170100022).

705

706 **Conflict of interest:** none declared.

707

## 708 **References**

- 709 Altschul, S. F. et al. (1990). 'Basic Local Alignment Search Tool', *Journal of Molecular*  
710 *Biology*, 215: 403–10.
- 711 Altschul, S. F. et al. (1997). 'Gapped BLAST and PSI-BLAST: a New Generation of Protein  
712 Database Search Programs.', *Nucleic Acids Research*, 25: 3389–402.
- 713 Bergner, L. M. et al. (2020). 'Demographic and Environmental Drivers of Metagenomic  
714 Viral Diversity in Vampire Bats', *Molecular Ecology*, 29: 26–39.
- 715 Bolger, A. M., Lohse, M., and Usadel, B. (2014). 'Trimmomatic: a Flexible Trimmer For  
716 Illumina Sequence Data', *Bioinformatics*, 30: 2114–20.
- 717 Brenes, R. et al. (2014). 'Transmission of *Ranavirus* between Ectothermic Vertebrate Hosts',  
718 *PLoS One*, 9: e92476.
- 719 Brennan, I. G., and Oliver, P. M. (2017). 'Mass Turnover and Recovery Dynamics of a  
720 Diverse Australian Continental Radiation', *Evolution*, 71: 1352–65.
- 721 Buchfink, B., Reuter, K., and Drost, H.-G. (2021). 'Sensitive Protein Alignments at Tree-of-  
722 Life Scale Using DIAMOND', *Nature Methods*, 18: 366–8.
- 723 Byrne, M. et al. (2011). 'Decline of a Biome: Evolution, Contraction, Fragmentation,  
724 Extinction and Invasion of the Australian Mesic Zone Biota', *Journal of*  
725 *Biogeography*, 38: 1635–56.

- 726 Capella-Gutiérrez, S., Silla-Martínez, J. M., and Gabaldón, T. (2009). ‘trimAl: a Tool for  
727 Automated Alignment Trimming in Large-Scale Phylogenetic Analyses’,  
728 *Bioinformatics*, 25: 1972–3.
- 729 Chapman, A. D. (2009). *Numbers of Living Species in Australia and the World*. Australian  
730 Government, Department of the Environment, Water, Heritage, and the Arts.
- 731 Chen, Y.-M. et al. (2023). ‘Host Traits Shape Virome Composition and Virus Transmission  
732 in Wild Small Mammals’, *Cell*, 186: 4662–75.
- 733 Chen, Y.-M. et al. (2022). ‘RNA Viromes from Terrestrial Sites Across China Expand  
734 Environmental Viral Diversity’, *Nature Microbiology*, 7: 1312–23.
- 735 Cox, N. et al. (2022). ‘A Global Reptile Assessment Highlights Shared Conservation Needs  
736 of Tetrapods’, *Nature*, 605: 285–90.
- 737 Emmenegger, E. J. et al. (2014). ‘Molecular Identification of Erythrocytic Necrosis Virus  
738 (ENV) From the Blood of Pacific herring (*Clupea pallasii*)’, *Veterinary  
739 Microbiology*, 174: 16–26.
- 740 Ferris, M. T., Heise, M. T., and Baric, R. S. (2016). ‘Host Genetics: It Is Not Just the Virus,  
741 Stupid’. In Katze M. G., Korth M. J., Law G. L., and Nathanson N. (eds) *Viral  
742 Pathogenesis (Third Edition)*, pp. 169–79. Academic Press: Boston.
- 743 Fu, L., et al. (2012). ‘CD-HIT: Accelerated for Clustering the Next-Generation Sequencing  
744 Data’, *Bioinformatics*, 28: 3150–2.
- 745 Geoghegan, J. L. et al. (2021). ‘Virome Composition in Marine Fish Revealed by Meta-  
746 Transcriptomics’, *Virus Evolution*, 7: veab005.
- 747 Geoghegan, J. L., Duchêne, S., and Holmes, E. C. (2017). ‘Comparative Analysis Estimates  
748 the Relative Frequencies of Co-Divergence and Cross-Species Transmission Within  
749 Viral Families’, *PLoS Pathogens*, 13: e1006215.
- 750 Geoghegan, J. L., and Holmes, E. C. (2017). ‘Predicting Virus emergence Amid Evolutionary  
751 Noise’, *Open Biology*, 7: 170189.
- 752 Geyle, H. M. et al. (2021). ‘Reptiles on the Brink: Identifying the Australian Terrestrial  
753 Snake and Lizard Species Most at Risk of Extinction’, *Pacific Conservation Biology*,  
754 27: 3–12.
- 755 Grabherr, M. G. et al. (2011). ‘Full-Length Transcriptome Assembly from RNA-Seq Data  
756 Without a Reference Genome’, *Nature Biotechnology*, 29: 644–52.
- 757 Grosset, C. et al. (2014). ‘Intraerythrocytic Iridovirus in Central Bearded Dragons (*Pogona  
758 vitticeps*)’, *Journal of Veterinary Diagnostic Investigation*, 26: 354–64.
- 759 Guindon, S. et al. (2010). ‘New Algorithms and Methods to Estimate Maximum-Likelihood  
760 Phylogenies: Assessing the Performance of PhyML 3.0’, *Systematic Biology*, 59:  
761 307–21.
- 762 Harding, E. F. et al. (2022). ‘Revealing the Uncharacterised Diversity of Amphibian and  
763 Reptile Viruses’, *ISME Communications*, 2: 95.
- 764 Hepojoki, J. et al. (2015). ‘Arenavirus Coinfections Are Common in Snakes with Boid  
765 Inclusion Body Disease’, *Journal of Virology*, 89: 8657–60.
- 766 Herrera-Flores, J. A., Stubbs, T. L., and Benton, M. J. (2021). ‘Ecomorphological  
767 Diversification of Squamates in the Cretaceous’, *Royal Society Open Science*, 8:  
768 201961.
- 769 Hyndman, T. H. et al. (2018). ‘Divergent Bornaviruses from Australian Carpet Pythons with  
770 Neurological Disease Date the Origin of Extant *Bornaviridae* Prior to the End-  
771 Cretaceous Extinction’, *PLoS Pathogens*, 14: e1006881.
- 772 Kalyaanamoorthy, S. et al. (2017). ‘ModelFinder: Fast Model Selection for Accurate  
773 Phylogenetic Estimates’, *Nature Methods*, 14: 587–9. 5
- 774 Kuhn, J. H. et al. (2015). ‘Taxonomic Reorganization of the Family *Bornaviridae*’, *Archives  
775 of Virology*, 160: 621–32.

- 776 Lagkouvardos, I. et al. (2017). ‘Rhea: a Transparent and Modular R Pipeline for Microbial  
777 Profiling Based on 16S rRNA Gene Amplicons’, *PeerJ*, 5: e2836.
- 778 Li, B. et al. (2010). ‘RNA-Seq Gene Expression Estimation with Read Mapping Uncertainty’,  
779 *Bioinformatics*, 26: 493–500.
- 780 Li, D. et al. (2015). ‘MEGAHIT: an Ultra-Fast Single-Node Solution for Large and Complex  
781 Metagenomics Assembly Via Succinct de Bruijn graph’, *Bioinformatics*, 31: 1674–6.
- 782 McAllister, J. et al. (2014). ‘Genomic Characterisation of Almpiwar virus, Harrison Dam  
783 virus and Walkabout Creek virus; Three Novel Rhabdoviruses from Northern  
784 Australia’, *Virology Reports*, 3–4: 1–17.
- 785 McMurdie, P. J., and Holmes, S. (2013). ‘phyloseq: an R Package for Reproducible  
786 Interactive Analysis and Graphics of Microbiome Census Data’, *PLoS One*, 8:  
787 e61217.
- 788 Mollentze, N., and Streicker, D. G. (2020). ‘Viral Zoonotic Risk is Homogenous Among  
789 Taxonomic Orders of Mammalian and Avian Reservoir Hosts’, *Proceedings of the  
790 National Academy of Sciences*, 117: 9423–30.
- 791 Moritz, C. C. et al. (2018). ‘Cryptic Lineage Diversity, Body Size Divergence, and Sympatry  
792 in a Species Complex of Australian Lizards (*Gehyra*)’, *Evolution*, 72: 54–66.
- 793 Moritz, C. et al. (2016). ‘Multilocus Phylogeography Reveals Nested Endemism in a Gecko  
794 Across the Monsoonal Tropics of Australia’, *Molecular Ecology*, 25: 1354–66.
- 795 Morton, S. R., and James, C. D. (1988). ‘The Diversity and Abundance of Lizards in Arid  
796 Australia: A New Hypothesis’, *The American Naturalist*, 132: 237–56.
- 797 Nguyen, L.-T. et al. (2015). ‘IQ-TREE: A Fast and Effective Stochastic Algorithm for  
798 Estimating Maximum-Likelihood Phylogenies’, *Molecular Biology and Evolution*,  
799 32: 268–74.
- 800 Oksanen, J. et al. (2022). ‘Vegan: Community Ecology Package’. [http://CRAN.R-](http://CRAN.R-project.org/package=vegan)  
801 [project.org/package=vegan](http://CRAN.R-project.org/package=vegan).
- 802 Olival, K. J. et al. (2017). ‘Host and Viral Traits Predict Zoonotic Spillover From Mammals’,  
803 *Nature*, 546: 646–50.
- 804 Oliver, P. M., and Hugall, A. F. (2017). ‘Phylogenetic Evidence for Mid-Cenozoic Turnover  
805 of a Diverse Continental biota’, *Nature Ecology & Evolution*, 1: 1896–902.
- 806 Ortiz-Baez, A. S. et al. (2020). ‘A Divergent *Articulavirus* in an Australian Gecko Identified  
807 Using Meta-Transcriptomics and Protein Structure Comparisons’, *Viruses*, 12: 613.
- 808 Papp, T., and Marschang, R. E. (2019). ‘Detection and Characterization of Invertebrate  
809 Iridoviruses Found in Reptiles and Prey Insects in Europe over the Past Two  
810 Decades’, *Viruses*, 11: 600.
- 811 Pfaff, F., and Rubbenstroth, D. (2021). ‘Two Novel Bornaviruses Identified in Colubrid and  
812 Viperid Snakes’, *Archives of Virology*, 166: 2611–4.
- 813 Pianka, E. R. (1969). ‘Habitat Specificity, Speciation, and Species Density in Australian  
814 Desert Lizards’, *Ecology*, 50: 498–502.
- 815 Pianka, E. R. (1973). ‘The Structure of Lizard Communities’, *Annual Review of Ecology and  
816 Systematics*, 4: 53–74.
- 817 Pincheira-Donoso, D. et al. (2013). ‘Global Taxonomic Diversity of Lving Reptiles’, *PLoS  
818 One*, 8: e59741.
- 819 Potter, S. et al. (2018). ‘Pleistocene Climatic Changes Drive Diversification Across a  
820 Tropical Savanna’, *Molecular Ecology*, 27: 520–32.
- 821 Pyron, R. A., Burbrink, F. T., and Wiens, J. J. (2013). ‘A Phylogeny and Revised  
822 Classification of Squamata, Including 4161 Species of Lizards and Snakes’, *BMC  
823 Evolutionary Biology*, 13: 93.
- 824 Raghwani, J. et al. (2022). ‘Seasonal Dynamics of the Wild Rodent Faecal Virome’,  
825 *Molecular Ecology*, 32: 4763–76.

- 826 Russo, A. G. et al. (2018). ‘Viral Discovery in the Invasive Australian Cane Toad (*Rhinella*  
827 *marina*) Using Metatranscriptomic and Genomic Approaches’, *Journal of Virology*,  
828 92/17: e00768-18.
- 829 Russo, A. G. et al. (2021). ‘Discovery of Novel Viruses Associated with the Invasive Cane  
830 Toad (*Rhinella marina*) in Its Native and Introduced Ranges’, *Frontiers in*  
831 *Microbiology*, 12:733631.
- 832 Shi, M. et al. (2018). ‘The Evolutionary History of Vertebrate RNA Viruses’, *Nature*, 556:  
833 197–202.
- 834 Tirera, S. et al. (2021). ‘The Influence of Habitat on Viral Diversity in Neotropical Rodent  
835 Hosts’, *Viruses*, 1: 1690.
- 836 Vasilakis, N. et al. (2019). ‘Genomic Characterisation of Cuiaba and Charleville viruses:  
837 Arboviruses (family *Rhabdoviridae*, genus *Sripuvirus*) Infecting Reptiles and  
838 Amphibians’, *Virus Genes*, 55: 87–94.
- 839 Wilfert, L., and Jiggins, F. M. (2014). ‘Flies on the Move: An Inherited Virus Mirrors  
840 *Drosophila melanogaster*’s Elusive Ecology and Demography’, *Molecular Ecology*,  
841 23: 2093–104.
- 842 Wille, M. et al. (2018). ‘Virus–Virus Interactions and Host Ecology are Associated with  
843 RNA Virome Structure in Wild Birds’, *Molecular Ecology*, 27: 5263–78.
- 844 Wille, M. et al. (2023). ‘Strong Host Phylogenetic and Ecological Effects on Host  
845 Competency for Avian Influenza in Australian Wild Birds’, *Proceedings of the Royal*  
846 *Society B: Biological Sciences*, 290: 20222237.
- 847 Wille, M. et al. (2019). ‘Virome Heterogeneity and Connectivity in Waterfowl and Shorebird  
848 Communities’, *The ISME Journal*, 13: 2603–16.
- 849 Wilson, S., and Swan, G. (2017). *A Complete Guide to Reptiles of Australia*. Reed New  
850 Holland.
- 851 Zhang, J. et al. (2018). ‘Identification of a Novel Nidovirus as a Potential Cause of Large  
852 Scale Mortalities in the Endangered Bellinger River Snapping Turtle (*Myuchelys*  
853 *georgesii*)’, *PLoS One*, 13/10: e0205209.
- 854 Zhang, Y.-Z. et al. (2018). ‘The Diversity, Evolution and Origins of Vertebrate RNA  
855 Viruses’, *Current Opinion in Virology*, 31: 9–16.
